# Supplementary material
Source: PubMed Central journal article supplement (PMC6193844)
Supplement: NIHMS962813-supplement-supplement_1.pdf [file NIHMS962813-supplement-supplement_1.pdf]

**Supp. File 1: Location names and coordinates for samples examined**

**Supplementary table:** Details of the field sites where schistosome miracidium were collected from school children stool and urine samples.

| Schistosome species        | Location      | Country                        | Village / School | Latitude                        | Longitude        | Collection date |
|----------------------------|---------------|--------------------------------|------------------|---------------------------------|------------------|-----------------|
| <i>Schistosoma mansoni</i> | East Africa   | Tanzania                       | Nyamazugo        | -2.55731                        | 32.54214         | 2012            |
|                            |               |                                | Sekagi           | -2.39005                        | 33.09819         | 2012            |
|                            |               |                                | Kigongo          | -2.70955                        | 32.89879         | 2012            |
|                            |               |                                | Kabita           | -2.31845                        | 33.64372         | 2012            |
|                            |               |                                | Katunguru        | -2.50537937                     | 32.67316932      | 2012            |
|                            |               |                                | Luchelele        | -2.61916                        | 32.8733          | 2012            |
|                            |               |                                | Nyandago         | -2.69974                        | 31.85495         | 2012            |
|                            | West Africa   | Senegal                        | Nder             | 16.259306                       | -15.883925       | 2007/2008       |
|                            |               |                                | Temeye           | 16.333483                       | -15.766183       | 2007            |
|                            |               | Niger                          | Namarigoungou    | 14.3554                         | 1.2627           | 2006/2007       |
|                            |               |                                | Diambala         | 14.31376                        | 1.299648         | 2007            |
|                            |               | Cameroon                       | Bessoum          | 9.13562                         | 13.71521         | 2007            |
|                            |               | <i>Schistosoma haematobium</i> | East Africa      | Tanzania (Zanzibar archipelago) | Chambani (Pemba) | -5.333333       |
| Ngwachani (Pemba)          | -5.316667     |                                |                  |                                 | 39.75            | 2011            |
| Chanjamjamiri (Pemba)      | -5.2991833333 |                                |                  |                                 | 39.7607333333    | 2011            |
| Michakaini (Pemba)         | -5.233333     |                                |                  |                                 | 39.766667        | 2011            |
| Uwandani (Pemba)           | -6.3          |                                |                  |                                 | 39.266667        | 2011            |
| Pujini (Pemba)             | -5.3          |                                |                  |                                 | 39.8             | 2011            |
| Shumba Viamboni (Pemba)    | -5.0028833333 |                                |                  |                                 | 39.7719333333    | 2011            |

|  |  |  |                           |               |               |      |
|--|--|--|---------------------------|---------------|---------------|------|
|  |  |  | Kizimbani<br>(Pemba)      | -5.116667     | 39.733333     | 2011 |
|  |  |  | Mzambarauni<br>(Pemba)    | -5.083333     | 39.766667     | 2011 |
|  |  |  | Konde B<br>(Pemba)        | -4.95         | 39.75         | 2011 |
|  |  |  | Piki<br>(Pemba)           | -5.116667     | 39.766667     | 2011 |
|  |  |  | Wingwi<br>(Pemba)         | -5            | 39.833333     | 2011 |
|  |  |  | Ng'ombeni<br>(Pemba)      | -5.3521833333 | 39.6473666667 | 2011 |
|  |  |  | Vitongoji<br>(Pemba)      | -5.233333     | 39.833333     | 2011 |
|  |  |  | Bububu<br>(Unguja)        | -5.933333     | 39.233333     | 2011 |
|  |  |  | Chaani<br>(Unguja)        | -5.95         | 39.3          | 2011 |
|  |  |  | Fujoni<br>(Unguja)        | -6            | 39.2          | 2011 |
|  |  |  | Regeza Mwendo<br>(Unguja) | -6.14946667   | 39.25723333   | 2011 |
|  |  |  | Kinyasini<br>(Unguja)     | -5.733333     | 39.3          | 2011 |
|  |  |  | Mahonda<br>(Unguja)       | -6            | 39.25         | 2011 |
|  |  |  | Kitope<br>(Unguja)        | -6.016667     | 39.266667     | 2011 |
|  |  |  | Mchangani<br>(Unguja)     | -6.05         | 39.316667     | 2011 |
|  |  |  | Mwera<br>(Unguja)         | -6.15         | 39.283333     | 2011 |
|  |  |  | Kiboje                    | -6.083333     | 39.3          | 2011 |

|  |                |       |                            |               |              |      |
|--|----------------|-------|----------------------------|---------------|--------------|------|
|  |                |       | <i>(Unguja)</i>            |               |              |      |
|  |                |       | Kombeni<br><i>(Unguja)</i> | -6.25         | 39.266667    | 2011 |
|  |                |       | Mwenge<br><i>(Unguja)</i>  | -6.05865      | 39.25426667  | 2011 |
|  | West<br>Africa | Niger | Daikaina Bell              | 14.1875213979 | 1.4863100513 | 2013 |
|  |                |       | Dokimana                   | 13.0279       | 2.3301       | 2013 |
|  |                |       | Karma                      | 13.671667     | 1.815        | 2013 |
|  |                |       | Lata                       | 13.766667     | 1.666667     | 2013 |
|  |                |       | Libore Tonko               | 13.4034       | 2.1919       | 2013 |
|  |                |       | Namarde Goungou            | 13.6182       | 1.8801       | 2013 |
|  |                |       | Seberi                     | 13.294        | 2.3462       | 2013 |
|  |                |       | Tiaguirire                 | 13.271        | 2.3165       | 2013 |
|  |                |       | Yoreize kouara             | 13.6121       | 1.8648       | 2013 |
|  |                |       | Youri                      | 13.3342       | 2.2475       | 2013 |

**Supp. File 2: *S. haematobium* vaccine candidate list.** List of relevant vaccine candidates included in the design of the baits. Gene name and RNA id correspond to those in the annotation file of the *S. haematobium* genome.

| Gene name                                       | RNA id   |
|-------------------------------------------------|----------|
| Alkaline phosphatase, placental type            | rna8550  |
| Alkaline phosphatase, placental-like            | rna8552  |
| Alkaline phosphatase, placental type            | rna8708  |
| Alkaline phosphatase                            | rna10181 |
| Acetylcholinesterase                            | rna1212  |
| Acetylcholinesterase                            | rna1772  |
| Acetylcholinesterase                            | rna5122  |
| Hemoglobinase                                   | rna8838  |
| Endoplasmic reticulum metalloproteinase 1       | rna7306  |
| Methionine aminopeptidase 2                     | rna5991  |
| Methionine aminopeptidase 1                     | rna8741  |
| Triosephosphate isomerase                       | rna10340 |
| Glyceraldehyde-3-phosphate dehydrogenase        | rna9740  |
| Glyceraldehyde-3-phosphate dehydrogenase        | rna10942 |
| Acid sphingomyelinase-like phosphodiesterase 3b | rna6904  |
| Putative neutral sphingomyelinase               | rna8921  |
| TGF-beta receptor type-1                        | rna1191  |
| CD81 antigen                                    | rna9311  |
| Tetraspanin-33                                  | rna2147  |
| Tetraspanin-31                                  | rna4244  |
| Tetraspanin-1                                   | rna5080  |
| Tetraspanin-3                                   | rna6308  |
| 23 kDa integral membrane protein                | rna8830  |
| Dynein heavy chain 2, axonemal                  | rna362   |
| Dynein light chain LC6, flagellar outer arm     | rna513   |
| Dynein regulatory complex protein 1             | rna796   |

---

|                                             |         |
|---------------------------------------------|---------|
| Dynein light chain 2, cytoplasmic           | rna1126 |
| Dynein light chain LC6, flagellar outer arm | rna1127 |
| Dynein light chain 1, cytoplasmic           | rna1128 |
| Dynein light chain 2, cytoplasmic           | rna1131 |
| Dynein light chain LC6, flagellar outer arm | rna1132 |
| Dynein light chain 2, cytoplasmic           | rna1133 |
| Dynein light chain 2, cytoplasmic           | rna1134 |
| Dynein light chain 1, cytoplasmic           | rna1135 |
| Dynein light chain Tctex-type 1             | rna1148 |
| Dynein light chain Tctex-type 1             | rna1150 |
| Dynein light chain                          | rna1311 |
| Dynein light chain 4, axonemal              | rna1368 |
| Dynein heavy chain 10, axonemal             | rna1422 |
| Dynein heavy chain 10, axonemal             | rna1423 |
| Dynein heavy chain 7, axonemal              | rna2159 |
| Dynein heavy chain 6, axonemal              | rna4031 |
| Dynein heavy chain 6, axonemal              | rna4032 |
| Dynein heavy chain 6, axonemal              | rna4033 |
| Dynein heavy chain 6, axonemal              | rna4034 |
| Dynein light chain                          | rna4247 |
| Dynein light chain 2, cytoplasmic           | rna4248 |
| Dynein assembly factor 1, axonemal          | rna4722 |
| Dynein light chain 2, cytoplasmic           | rna5138 |
| Dynein light chain                          | rna5139 |
| Dynein light chain                          | rna5141 |
| Dynein light chain 2, cytoplasmic           | rna5459 |
| Dynein heavy chain 7, axonemal              | rna5588 |
| Dynein heavy chain 7, axonemal              | rna5589 |
| Dynein light chain 2, cytoplasmic           | rna5675 |
| Dynein light chain 2, cytoplasmic           | rna5676 |
| Dynein heavy chain 3, axonemal              | rna5744 |

---

---

|                                                           |          |
|-----------------------------------------------------------|----------|
| Dynein assembly factor with WDR repeat domains 1          | rna5927  |
| Dynein heavy chain 5, axonemal                            | rna5951  |
| Dynein-1-beta heavy chain, flagellar inner arm I1 complex | rna5955  |
| Dynein heavy chain 1, axonemal                            | rna7320  |
| Dynein heavy chain domain-containing protein 1            | rna7471  |
| Dynein heavy chain 7, axonemal                            | rna7561  |
| Dynein intermediate chain 2, ciliary                      | rna7918  |
| Dynein intermediate chain 2, ciliary                      | rna7919  |
| Dynein heavy chain 5, axonemal                            | rna7925  |
| Dynein light chain LC6, flagellar outer arm               | rna8219  |
| Dynein light chain 2, cytoplasmic                         | rna8220  |
| Dynein light chain 1, axonemal                            | rna8521  |
| Dynein heavy chain 17, axonemal                           | rna8962  |
| Dynein beta chain, ciliary                                | rna8963  |
| Dynein heavy chain 5, axonemal                            | rna9442  |
| Dynein light chain roadblock-type 2                       | rna9552  |
| Dynein intermediate chain 3, ciliary                      | rna10134 |
| Dynein 8 kDa light chain, flagellar outer arm             | rna10333 |
| Paramyosin                                                | rna1794  |
| Paramyosin                                                | rna7421  |
| Myosin heavy chain, striated muscle                       | rna2888  |
| hypothetical protein                                      | rna5575  |
| Myosin IA heavy chain                                     | rna8582  |
| Myosin heavy chain, non-muscle                            | rna10685 |
| Filamin-A                                                 | rna1676  |
| Filamin-A                                                 | rna828   |
| Syntenin-1                                                | rna842   |
| Syntenin-2                                                | rna7172  |
| Syntenin-1                                                | rna7314  |
| Fructose-bisphosphate aldolase                            | rna2767  |
| 14 kDa fatty acid-binding protein                         | rna4146  |

---

---

|                                                   |          |
|---------------------------------------------------|----------|
| 16 kDa calcium-binding protein                    | rna5514  |
| 16 kDa calcium-binding protein                    | rna5644  |
| 16 kDa calcium-binding protein                    | rna5711  |
| 16 kDa calcium-binding protein                    | rna5712  |
| 16 kDa calcium-binding protein                    | rna6178  |
| 16 kDa calcium-binding protein                    | rna6179  |
| 16 kDa calcium-binding protein                    | rna6180  |
| 16 kDa calcium-binding protein                    | rna6182  |
| 16 kDa calcium-binding protein                    | rna6183  |
| 20 kDa calcium-binding protein                    | rna9455  |
| Sarcoplasmic calcium-binding protein              | rna9646  |
| Calcium-binding protein 39-like                   | rna9746  |
| Lysosomal aspartic protease                       | rna6107  |
| Calpain                                           | rna1921  |
| Calreticulin                                      | rna8129  |
| 40S ribosomal protein S4                          | rna1834  |
| 60S ribosomal protein L7a                         | rna1229  |
| 60S ribosomal protein L7a                         | rna1230  |
| Tubulin polyglutamylase TTLL7                     | rna4902  |
| 60S ribosomal protein L7                          | rna11001 |
| hypothetical protein                              | rna1730  |
| Y-box-binding protein 3                           | rna1727  |
| Stomatin-2                                        | rna7623  |
| Stomatin-like protein 2, mitochondrial            | rna1119  |
| Tegument antigen                                  | rna5724  |
| hypothetical protein                              | rna3812  |
| Microsomal glutathione S-transferase 3            | rna2097  |
| Glutathione S-transferase omega-1                 | rna4464  |
| Glutathione S-transferase class-mu 28 kDa isozyme | rna6212  |
| Microsomal glutathione S-transferase 1            | rna7354  |
| Glutathione S-transferase class-mu 26 kDa isozyme | rna11108 |

---

---

|                                                                  |         |
|------------------------------------------------------------------|---------|
| Superoxide dismutase [Mn], mitochondrial                         | rna64   |
| Extracellular superoxide dismutase [Cu-Zn]                       | rna2827 |
| Extracellular superoxide dismutase [Cu-Zn]                       | rna2828 |
| Superoxide dismutase [Cu-Zn]                                     | rna8863 |
| Ectonucleotide pyrophosphatase/phosphodiesterase family member 5 | rna7706 |
| Ectonucleotide pyrophosphatase/phosphodiesterase family member 5 | rna8331 |
| Tegument antigen                                                 | rna8098 |
| Tetraspanning orphan receptor                                    | rna9576 |

---
